# Supplementary material for: The conserved aspartate ring of MCU mediates MICU1 binding and regulation in the mitochondrial calcium uniporter complex
Source: eLife journal article supplement (doi:10.7554/elife.41112), 2019-01-14
Supplement: supp [file elife-41112-supp-v2.zip]

Archive with 12 entries (12 files):
- elife_poa_e41112_Figure_5_figure_supplement_3.tif
- elife_poa_e41112_Figure_4_figure_supplement_1.tif
- elife_poa_e41112_Figure_7_figure_supplement_1.tif
- elife_poa_e41112_Figure_5_figure_supplement_4.tif
- elife_poa_e41112_Figure_5_figure_supplement_2.tif
- elife_poa_e41112_Figure_5_figure_supplement_1.tif
- elife_poa_e41112_Figure_3_figure_supplement_1.tif
- elife_poa_e41112_Figure_3_figure_supplement_2.tif
- elife_poa_e41112_Transparent_Reporting_File.pdf
- elife_poa_e41112_Figure_4_figure_supplement_2.tif
- elife_poa_e41112_Figure_5_figure_supplement_5.tif
- elife_poa_e41112_Figure_3_figure_supplement_3.tif
