# Supplementary figures and images for: The conserved aspartate ring of MCU mediates MICU1 binding and regulation in the mitochondrial calcium uniporter complex
Source: eLife journal article supplement (doi:10.7554/elife.41112), 2019-01-14

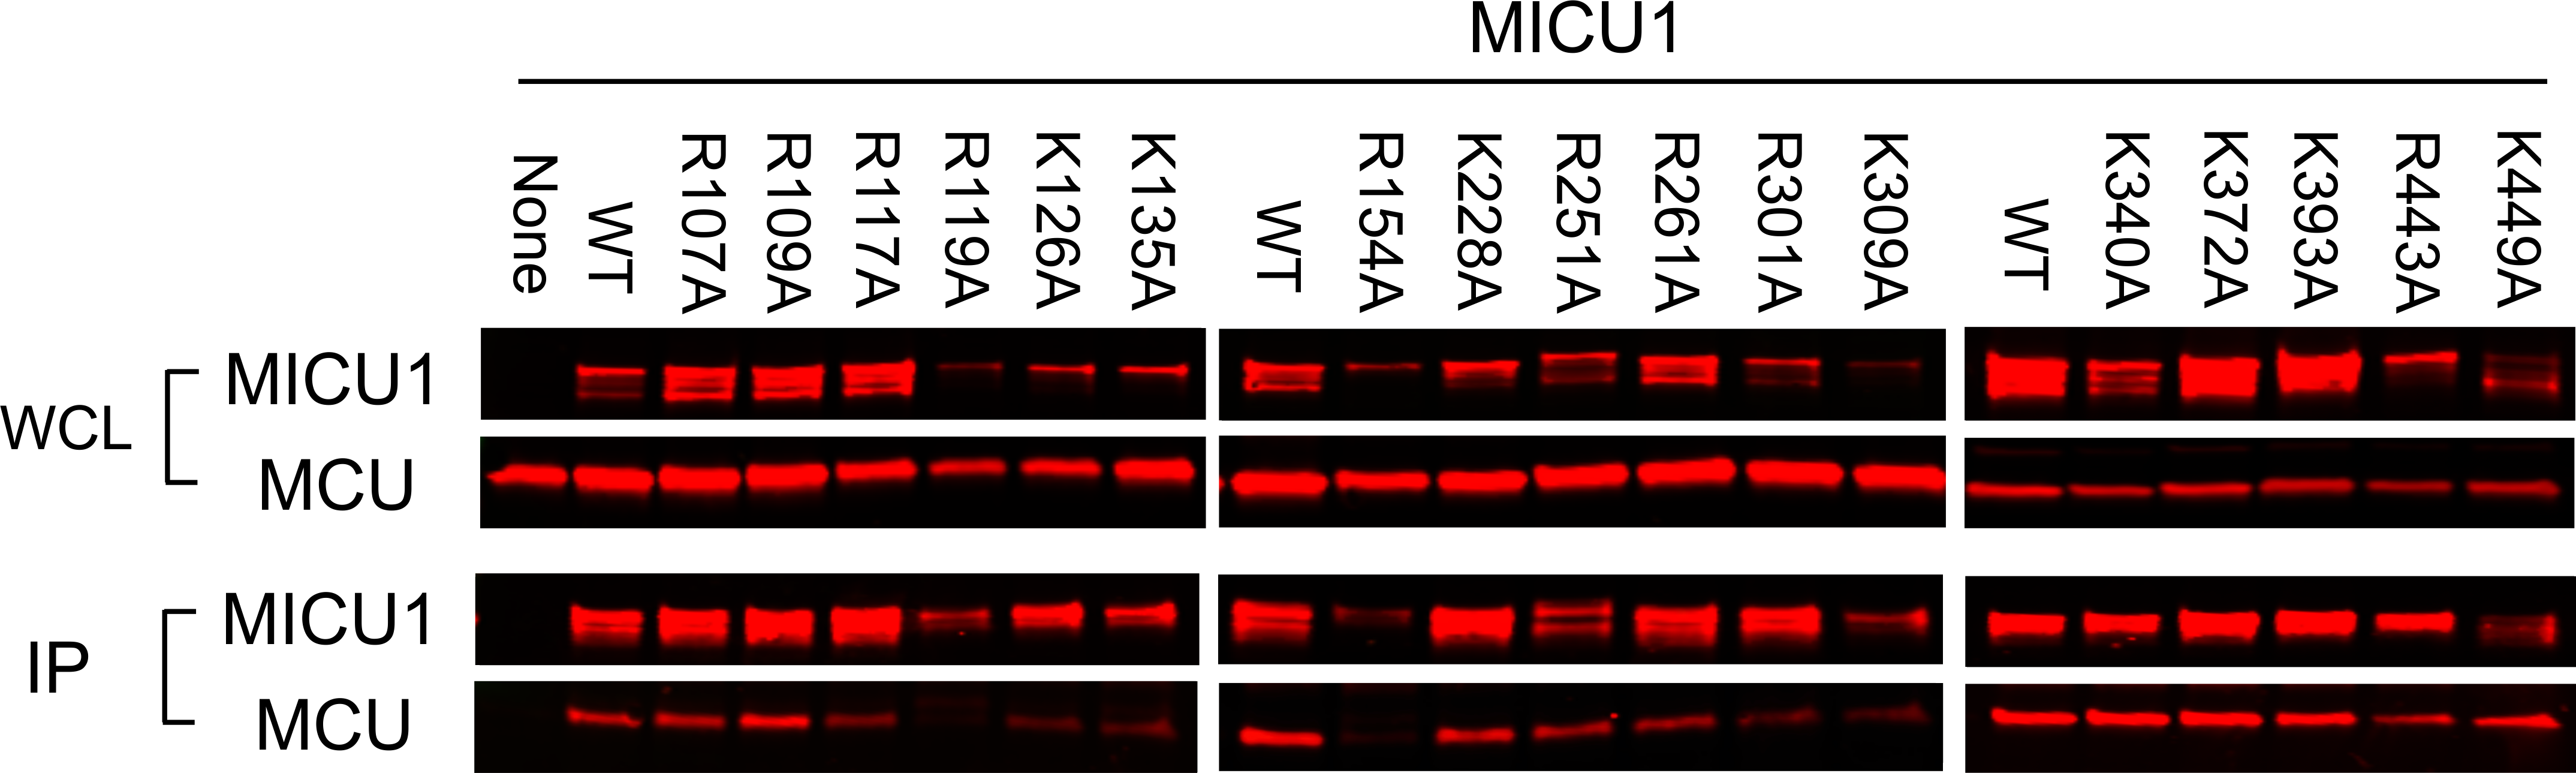

Supplement: supp [file elife-41112-supp-v2.zip › elife_poa_e41112_Figure_5_figure_supplement_3.tif]

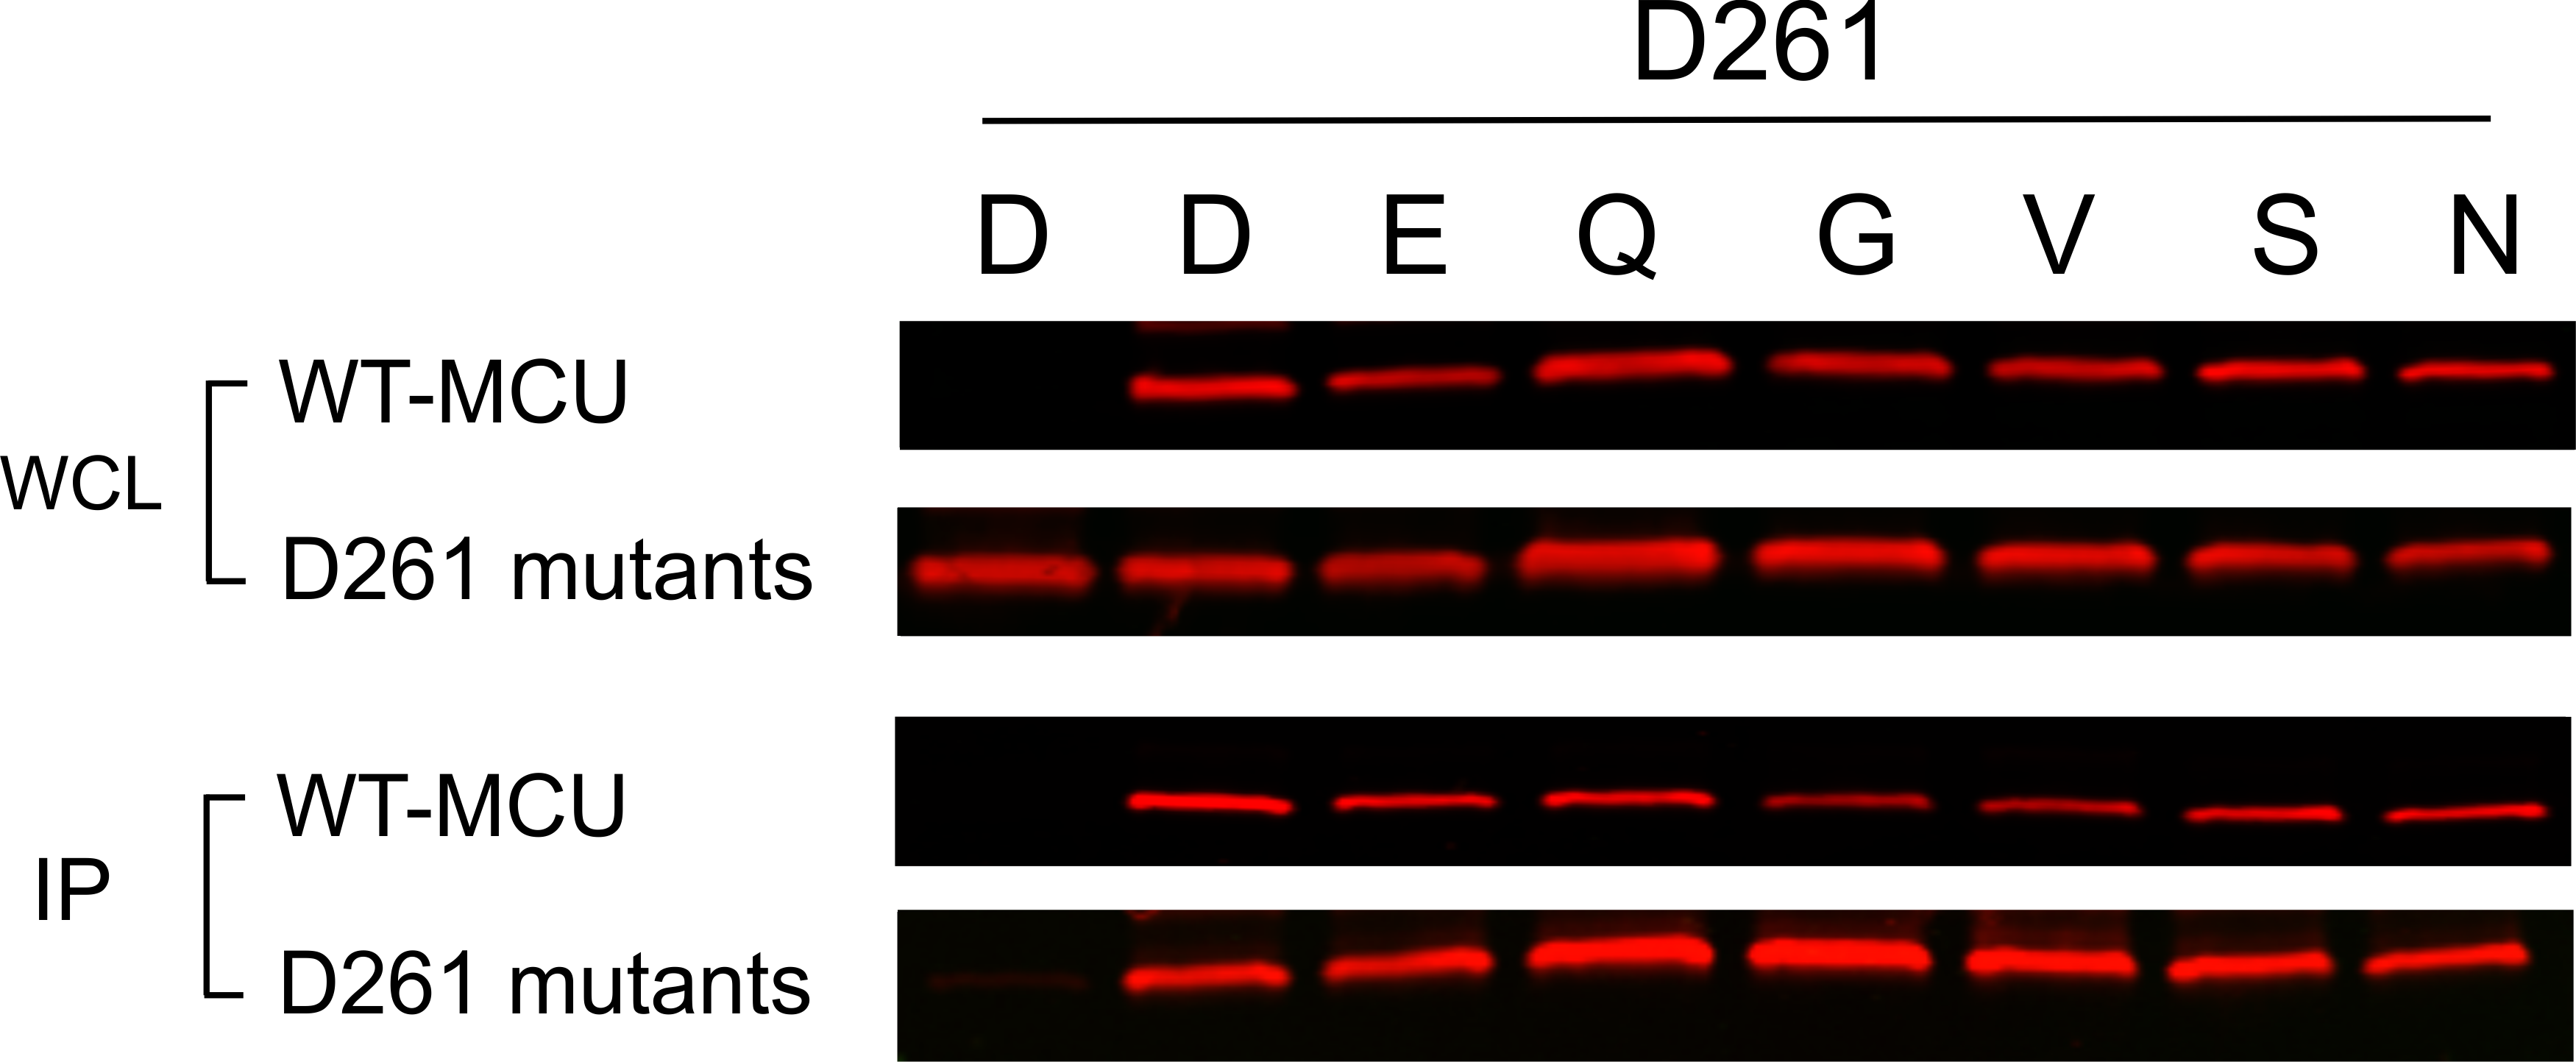

Supplement: supp [file elife-41112-supp-v2.zip › elife_poa_e41112_Figure_4_figure_supplement_1.tif]

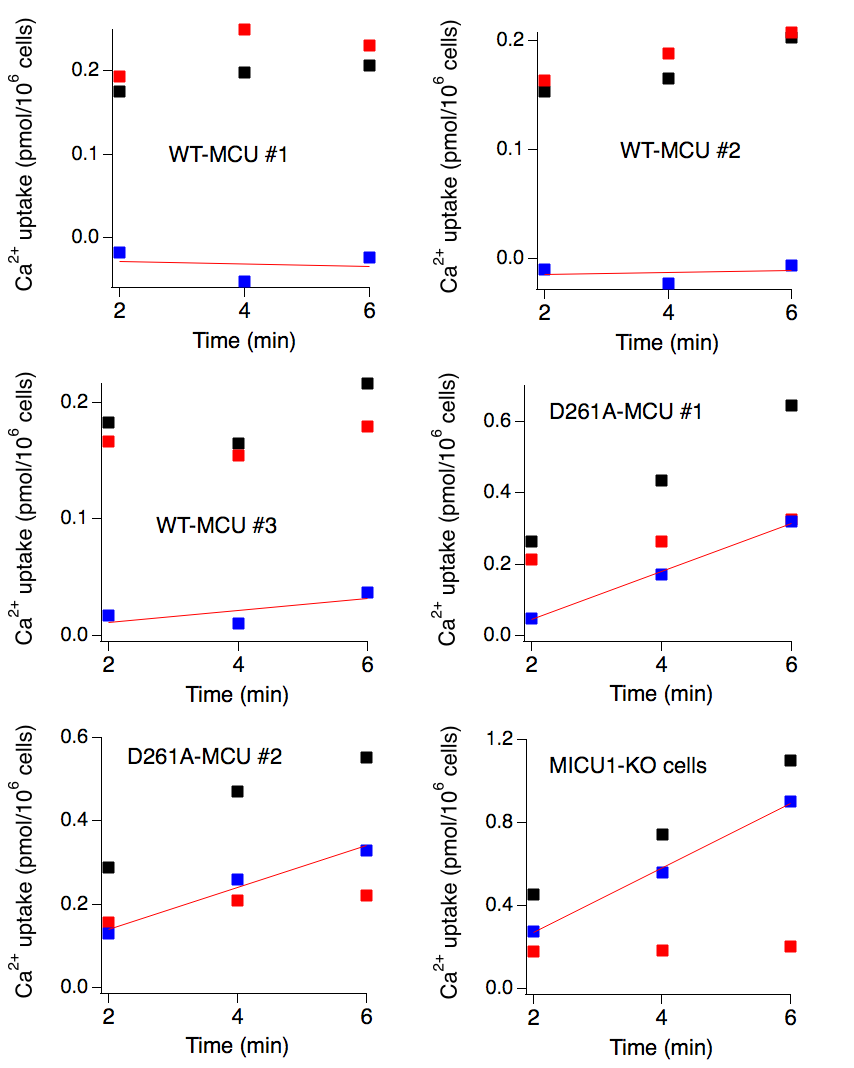

Supplement: supp [file elife-41112-supp-v2.zip › elife_poa_e41112_Figure_7_figure_supplement_1.tif]

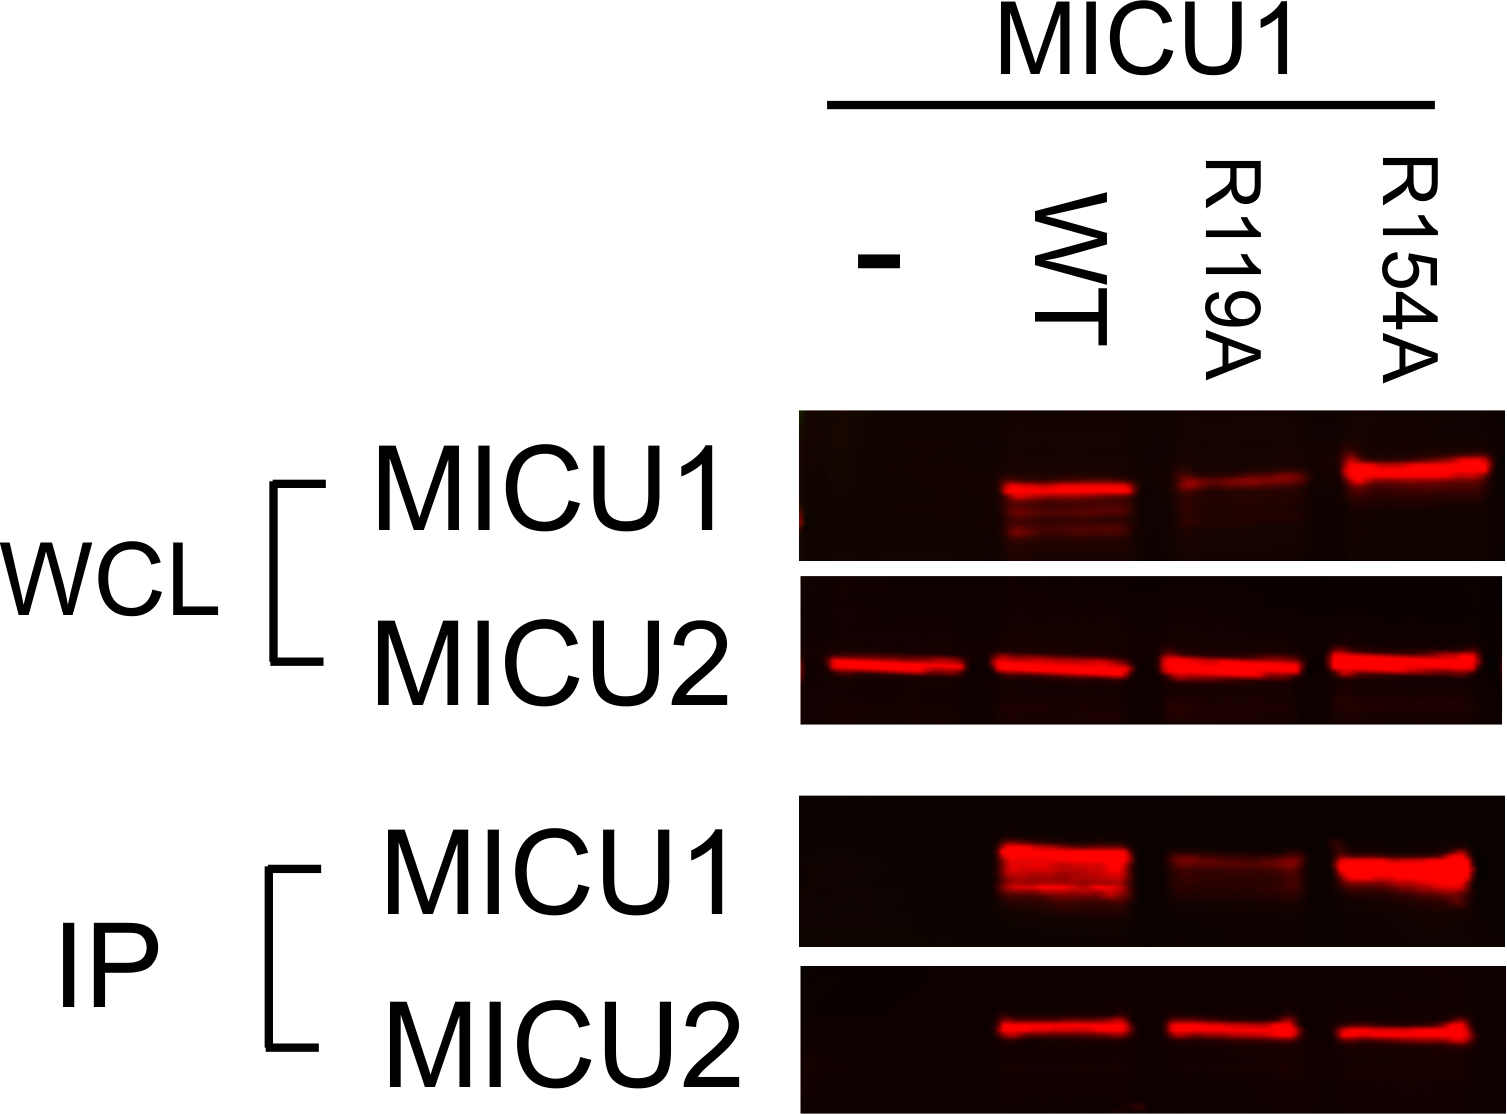

Supplement: supp [file elife-41112-supp-v2.zip › elife_poa_e41112_Figure_5_figure_supplement_4.tif]

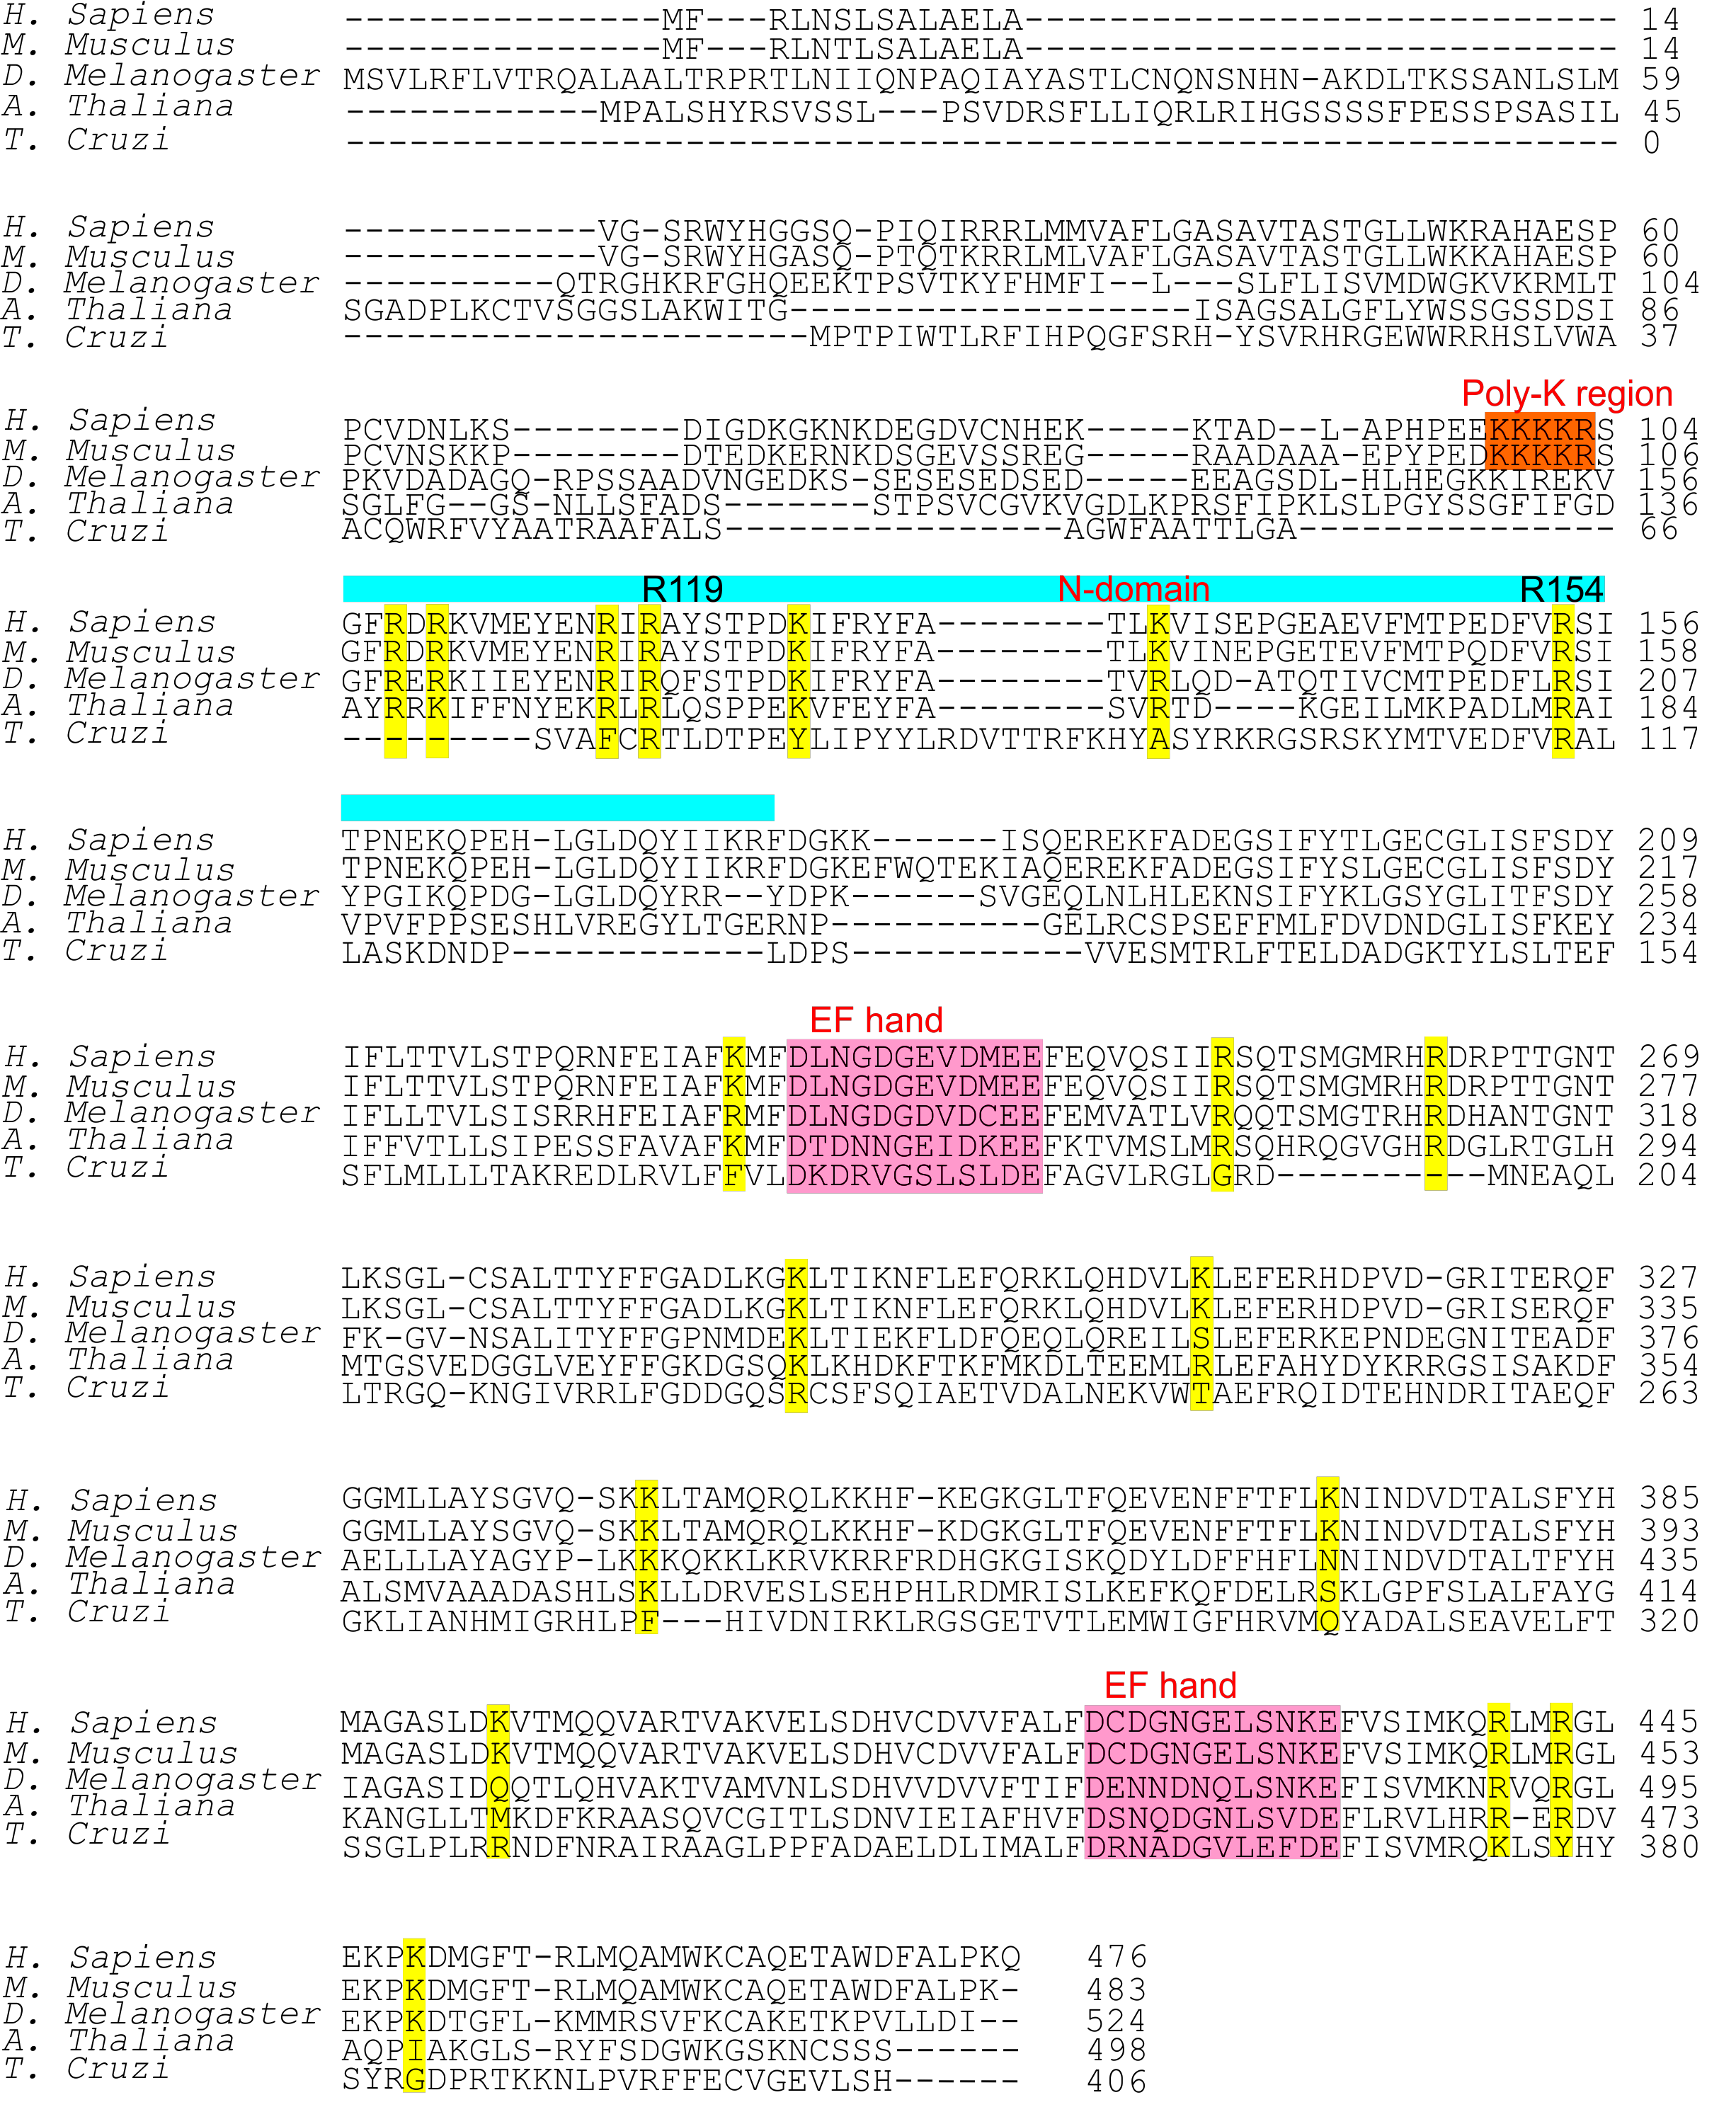

Supplement: supp [file elife-41112-supp-v2.zip › elife_poa_e41112_Figure_5_figure_supplement_2.tif]

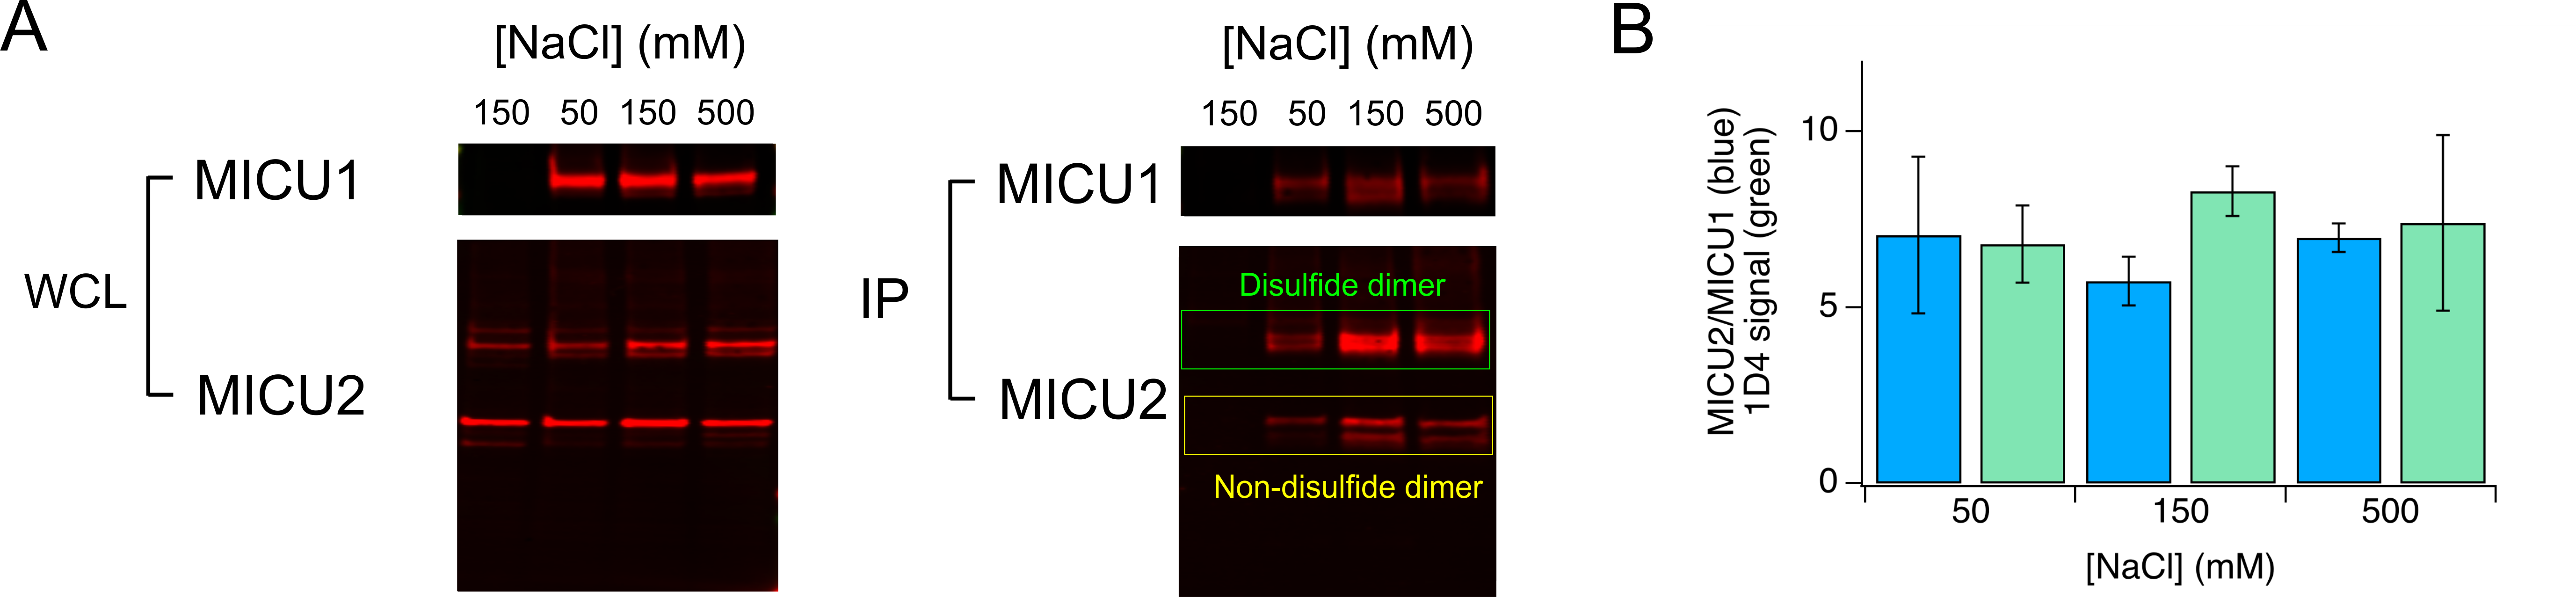

Supplement: supp [file elife-41112-supp-v2.zip › elife_poa_e41112_Figure_5_figure_supplement_1.tif]

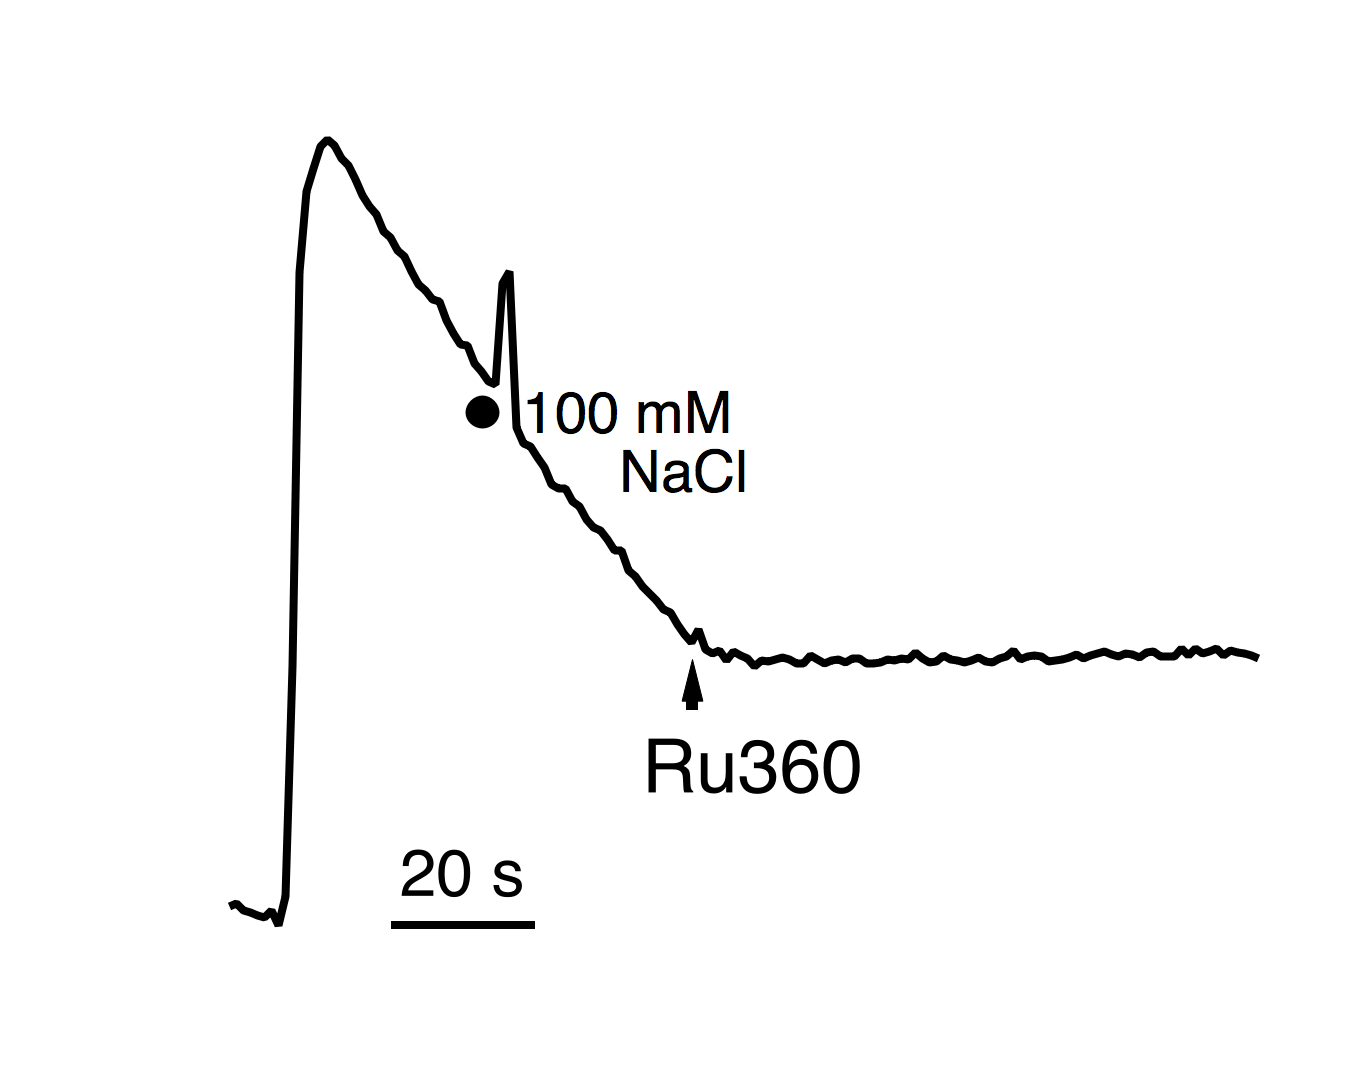

Supplement: supp [file elife-41112-supp-v2.zip › elife_poa_e41112_Figure_3_figure_supplement_1.tif]

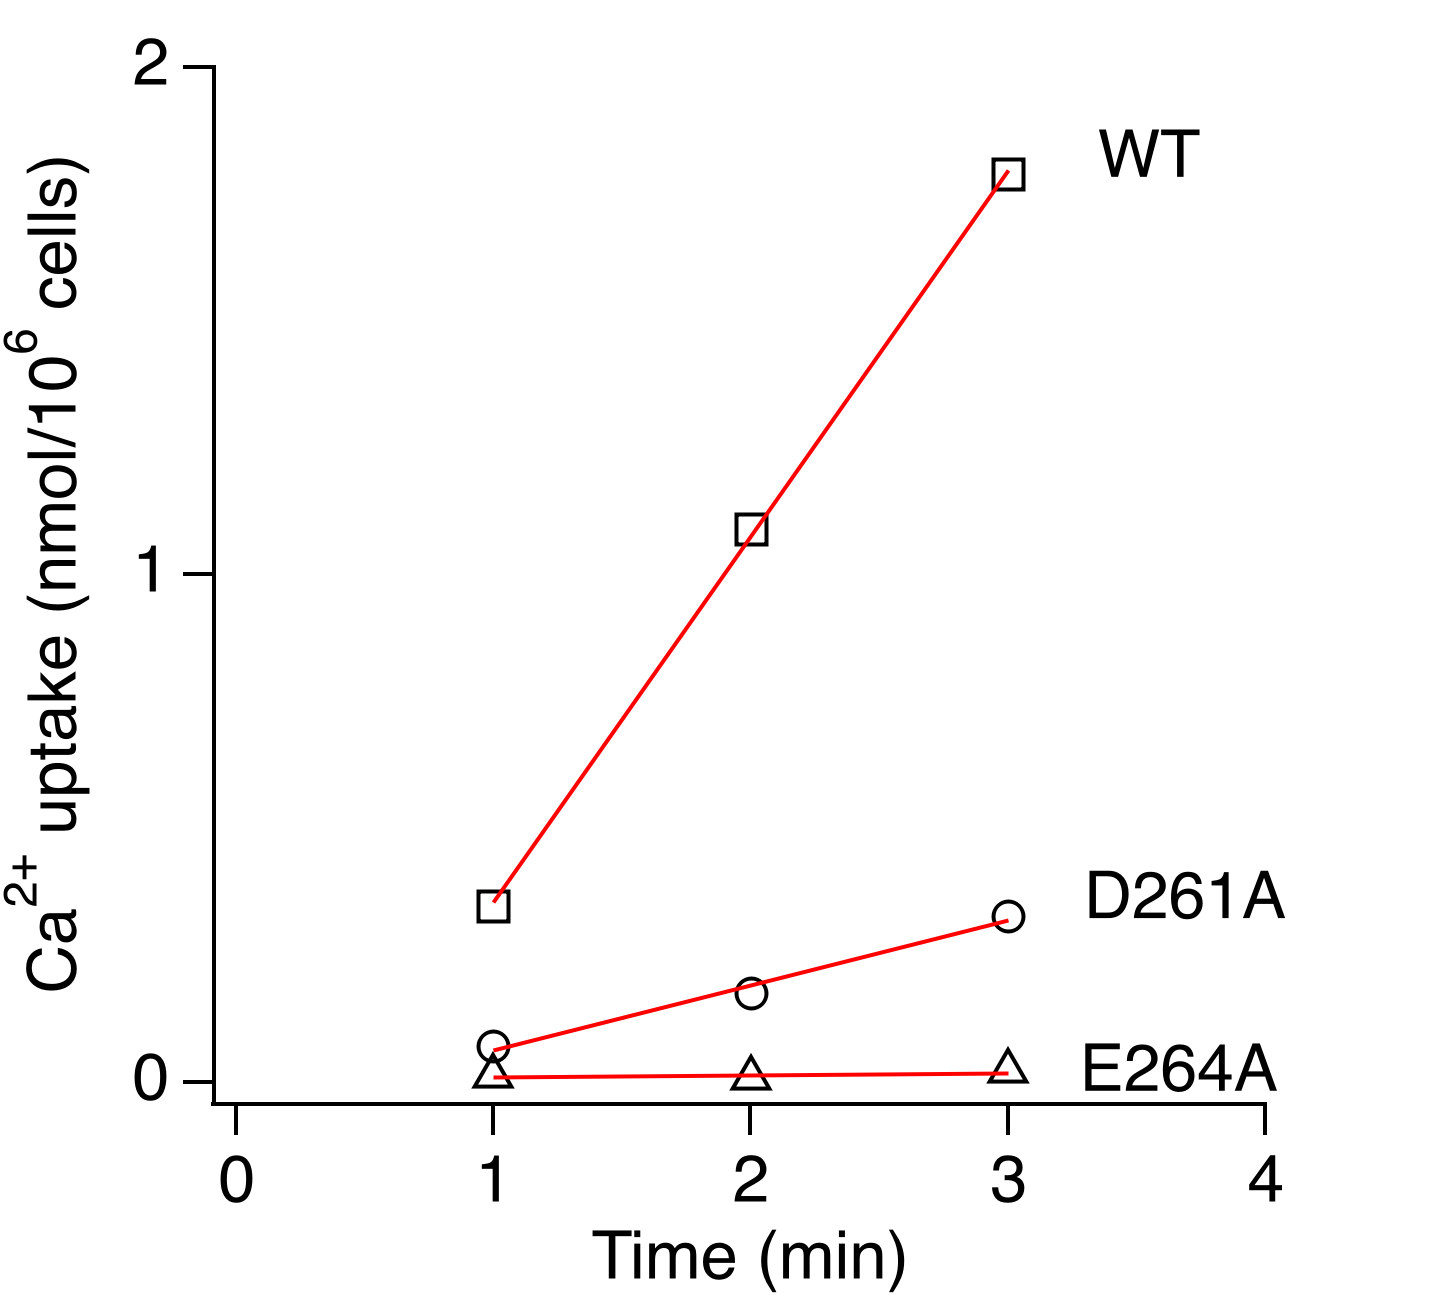

Supplement: supp [file elife-41112-supp-v2.zip › elife_poa_e41112_Figure_3_figure_supplement_2.tif]

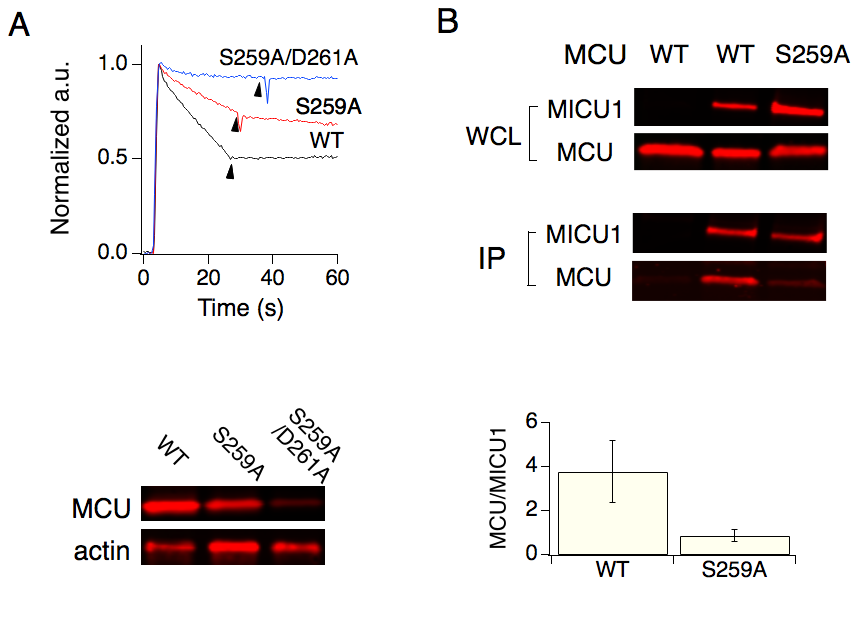

Supplement: supp [file elife-41112-supp-v2.zip › elife_poa_e41112_Figure_4_figure_supplement_2.tif]

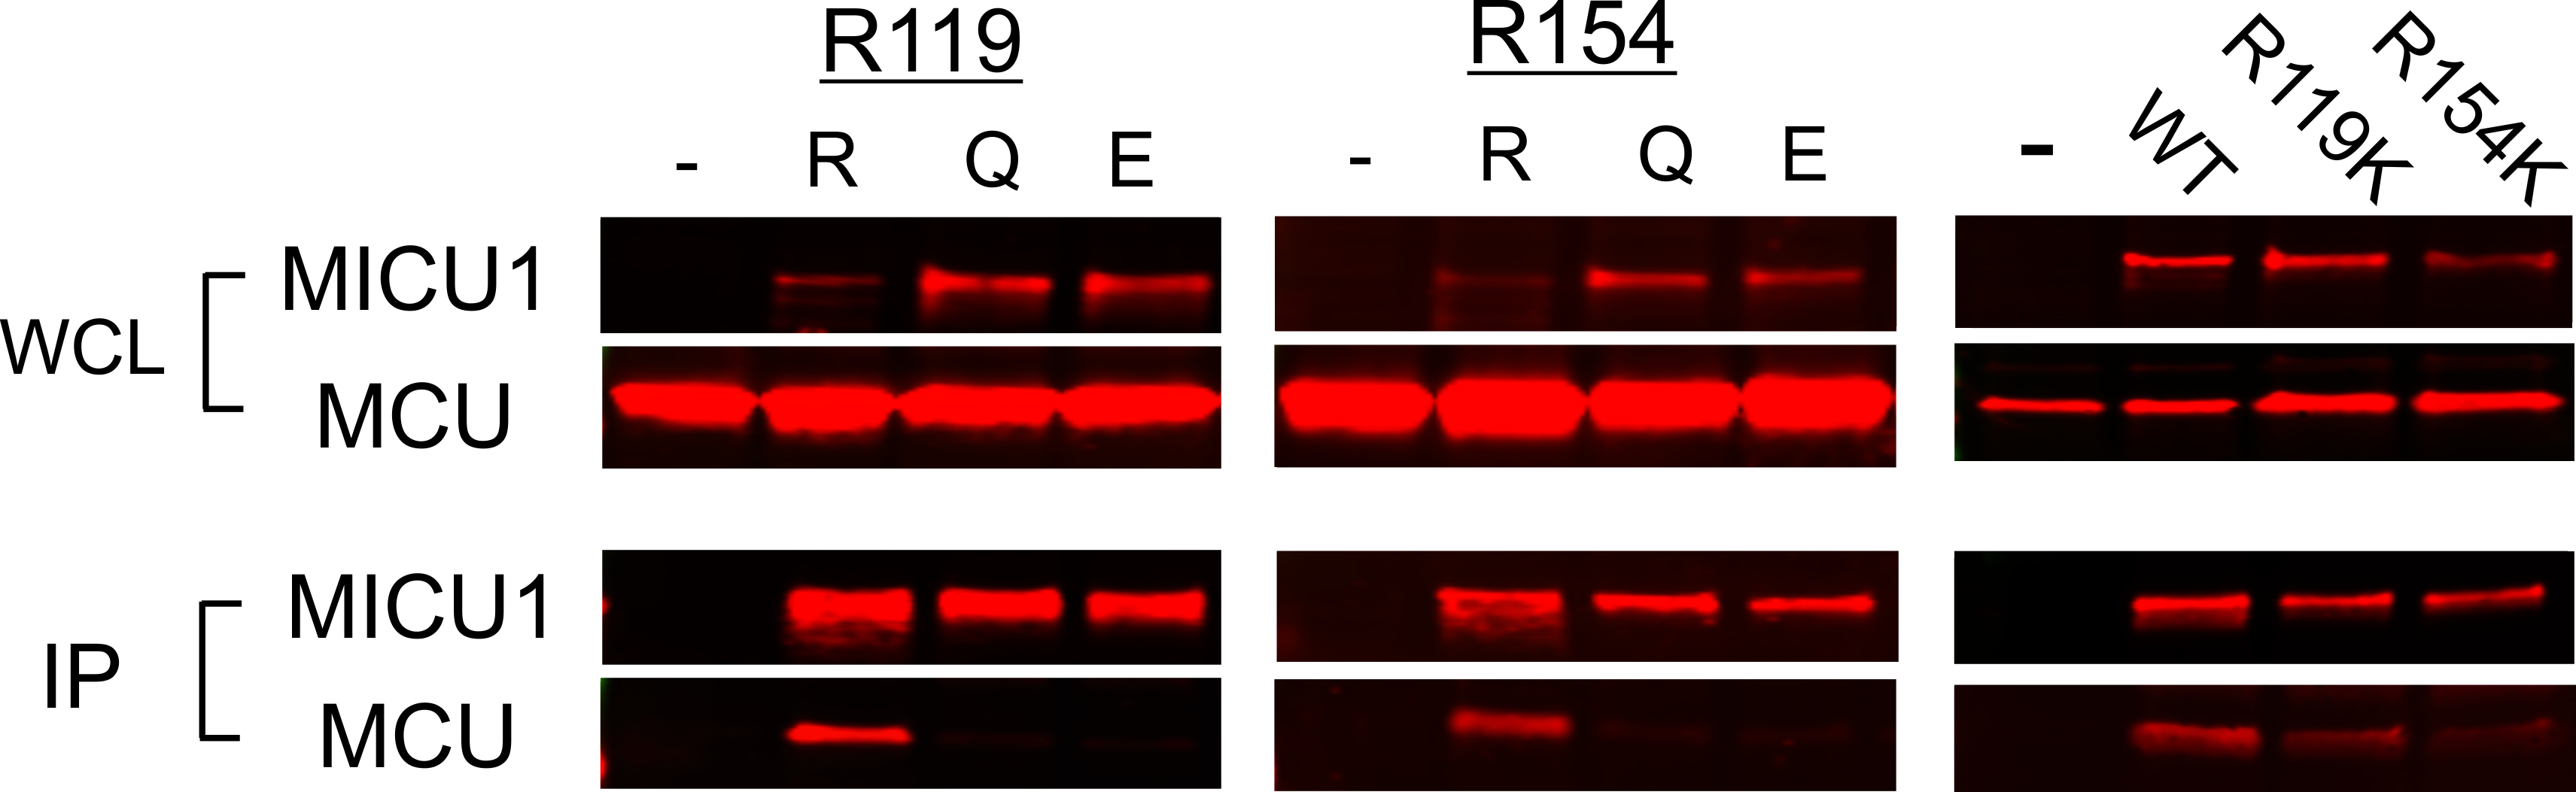

Supplement: supp [file elife-41112-supp-v2.zip › elife_poa_e41112_Figure_5_figure_supplement_5.tif]

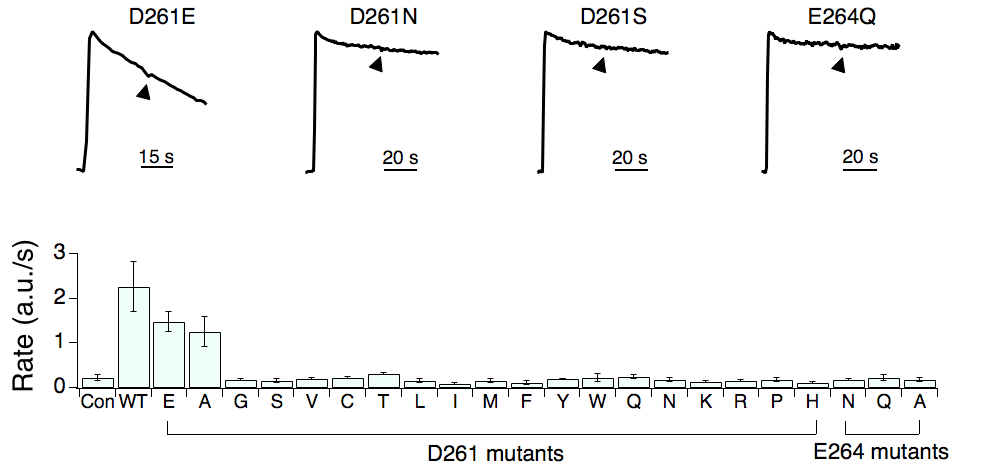

Supplement: supp [file elife-41112-supp-v2.zip › elife_poa_e41112_Figure_3_figure_supplement_3.tif]
